# Supplementary material for: HIV and Drug-Resistant Subtypes
Source: MDPI journal article supplement (doi:10.3390/microorganisms11010221), 2023-01-15
Supplement: s1 [file s1]

| Nucleoside reverse-transcriptase inhibitors (NRTIs) |                                            | Non Nucleoside reverse-transcriptase inhibitors (NRTIs)                                                                  |                                                                                               | Protease Inhibitors (PIs)                  |                                                                                          | Integrase Strand Transfer Inhibitors (INSTIs)                                                                                                                                                                                        |                                                                                                                                                                                         | Fusion Inhibitor of gp41                                                                                                                                                                                                                                                                    |
|-----------------------------------------------------|--------------------------------------------|--------------------------------------------------------------------------------------------------------------------------|-----------------------------------------------------------------------------------------------|--------------------------------------------|------------------------------------------------------------------------------------------|--------------------------------------------------------------------------------------------------------------------------------------------------------------------------------------------------------------------------------------|-----------------------------------------------------------------------------------------------------------------------------------------------------------------------------------------|---------------------------------------------------------------------------------------------------------------------------------------------------------------------------------------------------------------------------------------------------------------------------------------------|
| HIV-1                                               | HIV-2                                      | HIV-1                                                                                                                    | HIV-2                                                                                         | HIV-1                                      | HIV-2                                                                                    | HIV-1                                                                                                                                                                                                                                | HIV-2                                                                                                                                                                                   | HIV-1                                                                                                                                                                                                                                                                                       |
| <b>Abacavir</b><br>K65R <sup>[58,60-63]</sup>       | <b>Abacavir</b><br>Q151M <sup>[17]</sup>   | <b>Delavirdine</b><br>E138A <sup>[67]</sup>                                                                              | <b>Delavirdine</b><br>V106I <sup>[89]</sup><br>E138A <sup>[89]</sup><br>G190A <sup>[89]</sup> | <b>Atazanavir</b><br>I50L <sup>[106]</sup> | <b>Atazanavir</b>                                                                        | <b>Raltegravir</b><br>N155H±E92Q <sup>[108-109]</sup><br>Q148H/R/K± <sup>[108-109]</sup><br><br>G140S/A <sup>[108-109]</sup><br><br>Y143C/R <sup>[108-109]</sup><br><br>E157Q <sup>[108-109]</sup><br><br>G118R <sup>[108-109]</sup> | <b>Raltegravir</b><br>E92Q/Y143C <sup>[17]</sup><br>T97A/Y143C <sup>[17]</sup><br>Q148K/R <sup>[17]</sup><br>G140S/Q148R+N155H <sup>[17]</sup><br>E92Q/N155H+T97A/N155H <sup>[17]</sup> | <b>Enfuvirtide</b><br>G36DEV <sup>[118-120]</sup><br>V38EA <sup>[118-120]</sup><br><br>Q40H <sup>[118-120]</sup><br><br>N42T <sup>[118-120]</sup><br><br>N43D <sup>[118-120]</sup><br><br>R46K/M/Q <sup>[118-120]</sup><br><br>E137K <sup>[118-120]</sup><br><br>S138A <sup>[118-120]</sup> |
| <b>Didanosine</b><br>K65R <sup>[58,60-63]</sup>     | <b>Didanosine</b><br>Q151M <sup>[17]</sup> | <b>Efavirenz</b><br>E138A <sup>[67]</sup><br>L100I <sup>[77]</sup><br>K101E/P <sup>[77]</sup><br>K103N/S <sup>[77]</sup> | <b>Efavirenz</b><br>V106I <sup>[89]</sup><br>E138A <sup>[89]</sup><br>G190A <sup>[89]</sup>   | <b>Darunavir</b>                           | <b>Darunavir</b><br>I84V <sup>[17]</sup><br>L90M <sup>[17]</sup><br>I54M <sup>[17]</sup> | <b>Elvitegravir</b><br>Q148H/R/K <sup>[85]</sup><br><br>G140S/A <sup>[110-111]</sup><br>N155H <sup>[85]</sup>                                                                                                                        | <b>Elvitegravir</b><br>E92Q/Y143C <sup>[17]</sup><br>T97A/Y143C <sup>[17]</sup><br>Q148K/R <sup>[17]</sup><br>G140S/Q148R+N155H <sup>[17]</sup>                                         |                                                                                                                                                                                                                                                                                             |

|                                                                                                                               |                                                                                                 |                                                                                                                                                                                                                                                      |                                                                                               |                                           |                                           |                                                                                                                                                                      |                                       |  |
|-------------------------------------------------------------------------------------------------------------------------------|-------------------------------------------------------------------------------------------------|------------------------------------------------------------------------------------------------------------------------------------------------------------------------------------------------------------------------------------------------------|-----------------------------------------------------------------------------------------------|-------------------------------------------|-------------------------------------------|----------------------------------------------------------------------------------------------------------------------------------------------------------------------|---------------------------------------|--|
|                                                                                                                               |                                                                                                 | V106A/M <sup>[78]</sup><br>Y188C/H/L <sup>[77]</sup><br>G190A/S/E <sup>[77]</sup><br>M230L <sup>[77]</sup>                                                                                                                                           |                                                                                               |                                           |                                           | E92Q <sup>[85]</sup><br>E157Q <sup>[110-111]</sup>                                                                                                                   | E92Q/N155H+T97A/N155H <sup>[17]</sup> |  |
| <b>Emtricitabine</b><br>M184V/I <sup>[67]</sup>                                                                               | <b>Emtricitabine</b><br>Q151M <sup>[17]</sup><br>M184I/V <sup>[17]</sup><br>K65 <sup>[17]</sup> | <b>Etravirine</b><br>E138A <sup>[82-83]</sup><br>L100I <sup>[82-82]</sup><br>K101E/P <sup>[82-83]</sup><br>Y181C/I/V <sup>[82-83]</sup>                                                                                                              | <b>Etravirine</b><br>V106I <sup>[89]</sup><br>E138A <sup>[89]</sup><br>G190A <sup>[89]</sup>  | <b>Forsamprenavir</b>                     | <b>Forsamprenavir</b>                     | <b>Dolutegravir</b><br>Q148+E138± <sup>[112]</sup><br>G140 <sup>[112]</sup><br>N155H+Q148R <sup>[112]</sup><br>G118R <sup>[112]</sup><br>G118R-H51Y <sup>[112]</sup> | <b>Dolutegravir</b>                   |  |
| <b>Lamivudine</b><br>M184V/I <sup>[67]</sup>                                                                                  | <b>Lamivudine</b><br>Q151M <sup>[17]</sup>                                                      | <b>Nevirapine</b><br>E138A <sup>[86-87]</sup><br>K101E/P <sup>[77]</sup><br>K103N/S <sup>[77]</sup><br>V106A/M <sup>[78]</sup><br>Y181C/I/V <sup>[77]</sup><br>Y188C/H/L <sup>[77]</sup><br>G190A/S/E <sup>[77,80,81]</sup><br>M230L <sup>[77]</sup> | <b>Nevirapine</b><br>V106I <sup>[89]</sup><br>E138A <sup>[89]</sup><br>G190A <sup>[89]</sup>  | <b>Indinavir</b>                          | <b>Indinavir</b><br>I54M <sup>[17]</sup>  |                                                                                                                                                                      |                                       |  |
| <b>Stavudine</b><br>M41L <sup>[30,59]</sup><br>D67N <sup>[30,59]</sup><br>K70R <sup>[30,59]</sup><br>L210W <sup>[30,59]</sup> | <b>Stavudine</b><br>Q151M <sup>[17]</sup>                                                       | <b>Rilpivavine</b><br>E138A <sup>[84]</sup><br>K101E/P <sup>[84]</sup><br>K103N/S <sup>[84]</sup><br>V106A/M                                                                                                                                         | <b>Rilpivavine</b><br>V106I <sup>[89]</sup><br>E138A <sup>[89]</sup><br>G190A <sup>[89]</sup> | <b>Nelfinavir</b><br>D30N <sup>[92]</sup> | <b>Nelfinavir</b><br>I54M <sup>[17]</sup> |                                                                                                                                                                      |                                       |  |

|                                                                                                                                                                                            |                                            |                                                                                                                                                                   |  |                                            |                                                                                                                  |  |  |  |
|--------------------------------------------------------------------------------------------------------------------------------------------------------------------------------------------|--------------------------------------------|-------------------------------------------------------------------------------------------------------------------------------------------------------------------|--|--------------------------------------------|------------------------------------------------------------------------------------------------------------------|--|--|--|
| T215F/Y <sup>[30,59]</sup><br>K219Q/E <sup>[30,59]</sup>                                                                                                                                   |                                            | <sup>[84]</sup><br>Y181C/I/V<br><sup>[84]</sup><br>Y188C/H/L<br><sup>[84]</sup><br>G190A/G/E <sup>[79]</sup><br>M230L <sup>[84]</sup><br>E138K <sup>[86-87]</sup> |  |                                            |                                                                                                                  |  |  |  |
| <b>Tenofovir</b><br>K65R <sup>[66]</sup><br>M184V/I <sup>[66]</sup>                                                                                                                        | <b>Tenofovir</b><br>K65 <sup>[17]</sup>    |                                                                                                                                                                   |  | <b>Ritonavir</b>                           | <b>Ritonavir</b><br>I54M <sup>[17]</sup><br>I84V <sup>[17]</sup><br>L90M <sup>[17]</sup><br>I82F <sup>[17]</sup> |  |  |  |
| <b>Zidovudine</b><br>M41L <sup>[30,59]</sup><br>D67N <sup>[30,59]</sup><br>K70R <sup>[30,59]</sup><br>L210W <sup>[30,59]</sup><br>K219Q/E <sup>[30,59]</sup><br>T215Y/F <sup>[30,59]</sup> | <b>Zidovudine</b><br>Q151M <sup>[17]</sup> |                                                                                                                                                                   |  | <b>Saquinavir</b><br>V28A <sup>[104]</sup> | <b>Saquinavir</b><br>I84V <sup>[17]</sup><br>L90M <sup>[17]</sup><br>I54M <sup>[17]</sup>                        |  |  |  |
|                                                                                                                                                                                            |                                            |                                                                                                                                                                   |  | <b>Tipranavir</b>                          | <b>Tipranavir</b><br>I82L <sup>[17]</sup>                                                                        |  |  |  |
